# Supplementary material
Source: PubMed Central journal article supplement (PMC3180798)
Supplement: supp_tpc.111.085514_Tao_Supplemental_Data_Final.pdf [file supp_tpc.111.085514_Tao_Supplemental_Data_Final.pdf]

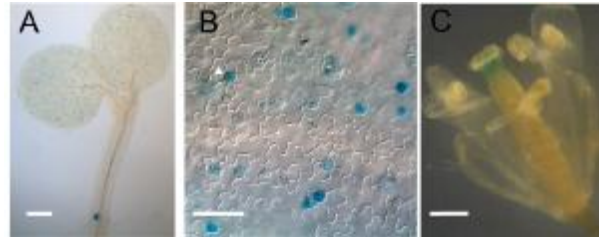

**Supplemental Figure 1. *RopGEF7* expression pattern analysis**

(A) *RopGEF7-GUS* expression in 5-d-old seedlings, GUS staining was for 16 h in (A)-(C).

(B) GUS activity was detected in meristemoids and guard cells of 5-d-old seedlings, arrowhead indicates meristemoid.

(C) GUS activity was detected in the style of the flowers.

Scale bars for (A) and (C), 200  $\mu\text{m}$ . Scale bar for (B), 20  $\mu\text{m}$ .

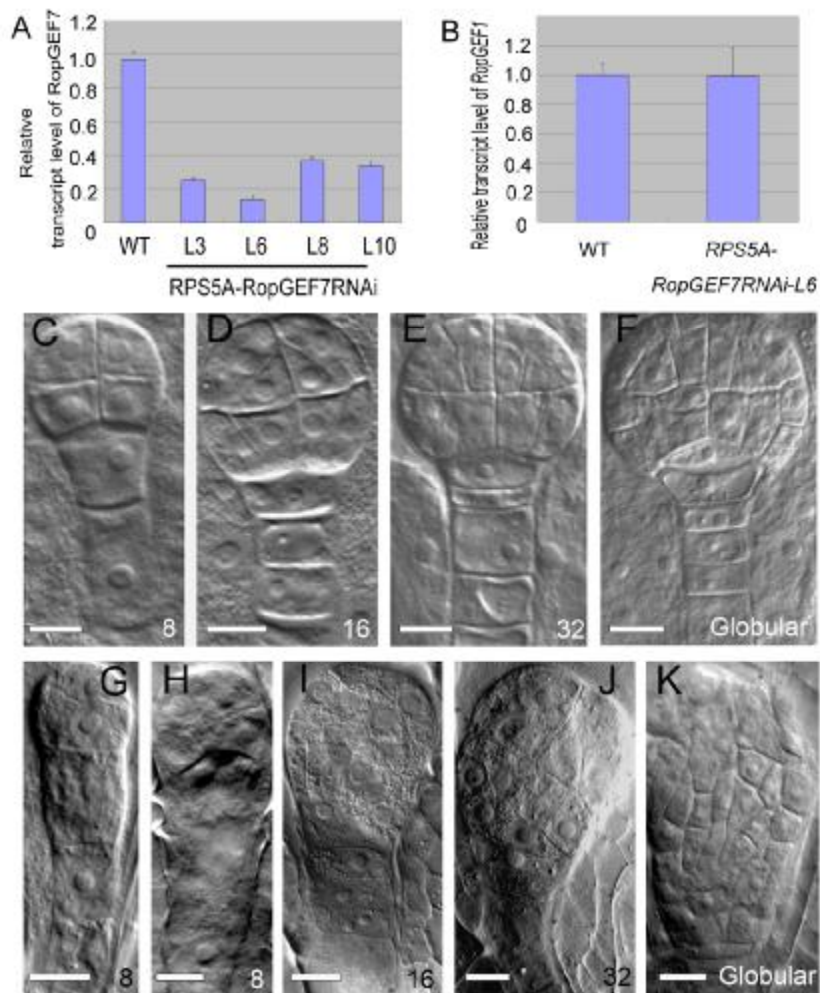

**Supplemental Figure 2. Early embryo phenotypes are observed in the *RopGEF7RNAi* lines**

(A) Relative transcript level of *RopGEF7* detected by qRT-PCR in embryos of four *RPS5A-RopGEF7RNAi* transgenic lines.

(B) Relative transcript level of *RopGEF1* was not affected in embryos of the *RPS5A-RopGEF7RNAi-L6* line.

(C) - (F) Wild-type embryos at 8-cells (C), 16-cells (D), 32-cells (E), and globular stage (F), respectively.

(G)-(K) Defects in *RPS5A-RopGEF7RNAi* embryos at corresponding stages as compared to wild-type. Figures at right bottom indicate the number of embryo cells.

Scale bars for (C)- (K), 20  $\mu$ m.

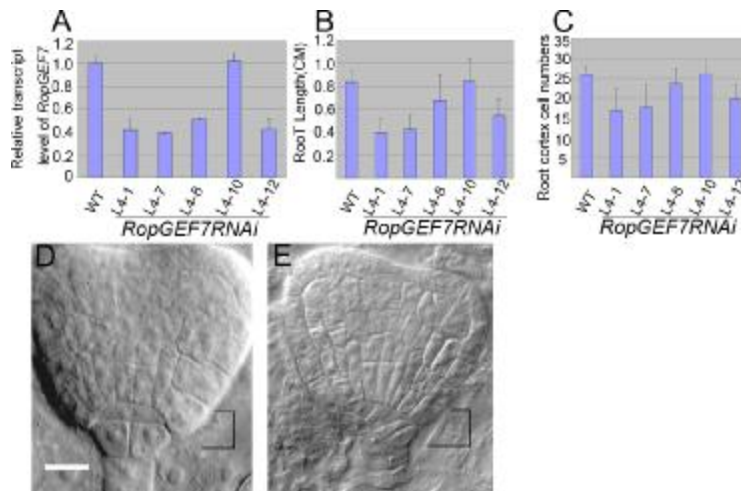

**Supplemental Figure 3. Analysis of *RopGEF7* RNAi transgenic lines**

**(A)** Identification of *35S-RopGEF7 RNAi* transgenic lines L4-1, L4-7, L4-8, L4-10, L4-12 by qRT-PCR analysis. qRT-PCR analysis revealed four lines with various levels of reduced *RopGEF7* transcripts compared with the wild-type.

**(B)-(C)** 5-d-old *RopGEF7* down-regulated lines show reduced root length **(B)** and smaller root meristem size compared with the wild type **(C)**. Data presented are average and SD (n=40 to 60).

**(D)-(E)** Comparison of embryo phenotype from wild-type **(D)** and *35S-RopGEF7RNAi* **(E)**-L1-9 line at heart stage. Bracketed area is the basal cell region.

Scale bars for **(D)**- **(E)**, 20  $\mu$ m.

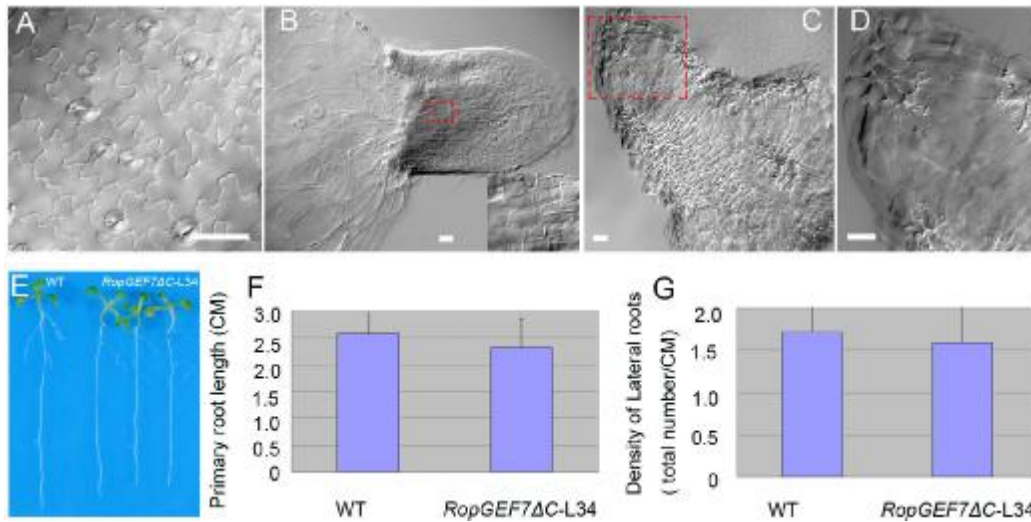

**Supplemental Figure 4 Analysis of *RopGEF7ΔC* overexpressing transgenic plants**

(A) Cotyledon epidermal cells of 7-d-old wild-type seedlings.

(B)-(D) Analysis of cell morphology in *RPS5A-RopGEF7ΔC* root-like structures, red dotted area in (B) indicate the root cell files that enlarged in insets, red dotted area in (C) indicates the root columella-like cells, (D) shows magnification of the tip region of the root-like structure in (C).

(E) Comparison of 8-d old seedlings in *RPS5A-RopGEF7ΔC -L34* line and the wild-type.

(F)-(G) Analysis of root length (F) and lateral roots (G) in 8-d-old seedlings between *RPS5A-RopGEF7ΔC -L34* line and the wild-type. Data presented are average and SD (n=40 to 60).

Scale bars for (A) to (D), 50 μm.

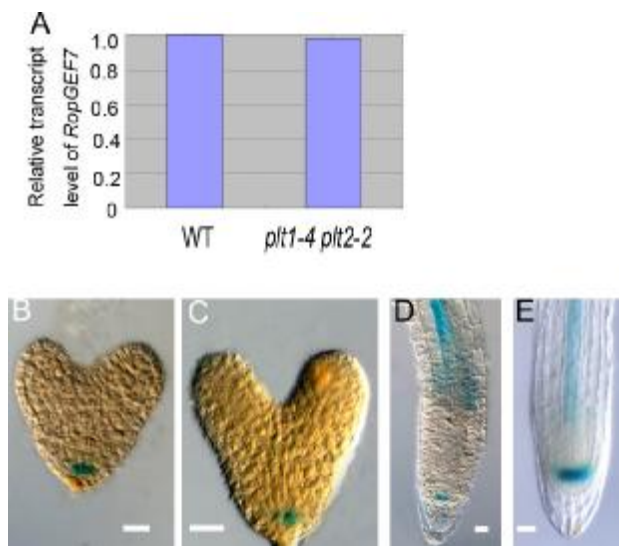

**Supplemental Figure 5. Expression of *RopGEF7* in *plt1-4 plt2-2* double mutant**

(A) Relative expression levels of *RopGEF7* detected by q-RT-PCR in 7-d-old seedlings of *plt1-4 plt2-2* compared with the wild-type.

(B)-(E) *RopGEF7-GUS* expression in embryos and 6-d-old seedlings of wild-type (B and D) and *plt1-4 plt2-2* (C and E), GUS staining was for 16 h in embryos, 6 h in seedlings.

Scale bars for (B) to (E), 20  $\mu$ m.

**Supplemental Table 1: Primers used in the study**

|                                              |                        |                                         |
|----------------------------------------------|------------------------|-----------------------------------------|
| Vector constructions                         | GEF7promoter-F         | 5'-AAGCTTCTTCATTCATCCATCCCACCT -3'      |
|                                              | GEF7promoter-R         | 5'-TCTAGACGTGCTTGAATCGCATTACAT -3'      |
|                                              | GEF7RNAi-F             | 5'-AAGCTTCTTACAAGACATTCATCGGA-3'        |
|                                              | GEF7RNAi-R             | 5'-GTCGACATCTCAAAGTCAAAGCCCAT-3'        |
|                                              | YFP-GEF7-F             | 5'-GAATTCATGGATGGTTCGTTCGGAAAAT-3'      |
|                                              | YFP-GEF7-R             | 5'-GTCGACGTCAAAGCCCATCTTTCCAA-3'        |
|                                              | YFP-GEF7 $\Delta$ C-F  | 5'-AAGCTTATGGATGGTTCGTTCGGAAAA -3'      |
|                                              | YFP-GEF7 $\Delta$ C-R  | 5'-GTCGACTCATCTTGTAAGATCATCAACAAAGAG-3' |
|                                              | YFP-AtRAC1-F           | 5'-CTGCAGTCCATTTCTGGTGGAGAAGG -3'       |
|                                              | YFP- AtRAC1-R          | 5'-GTCGACTTGTTCCAGAGTTCGTTGTGA -3'      |
|                                              | GEF7OX-F               | 5'-GAATTCTAATGCGATTCAAGCACGAG-3'        |
|                                              | GEF7OX-R               | 5'-GTCGACGTCAAAGCCCATCTTTCCAA-3'        |
|                                              | GEF7 $\Delta$ COX-F    | 5'-GTCGACATGGATGGTTCGTTCGGAAAA -3'      |
|                                              | GEF7 $\Delta$ COX-R    | 5'-GAATTCTCATCTTGTAAGATCATCAACAAAGAG-3' |
|                                              | cYFP-GEF7-F            | 5'-GAATTCATGGATGGTTCGTTCGGAAAATT-3'     |
|                                              | cYFP-GEF7-R            | 5'-GTCGACGTCAAAGCCCATCTTTCCAA-3'        |
|                                              | cYFP-GEF7 $\Delta$ C-F | 5'-GAATTCATGGATGGTTCGTTCGGAAAA -3'      |
|                                              | cYFP-GEF7 $\Delta$ C-R | 5'-GAATTCTCATCTTGTAAGATCATCAACAAAGAG-3' |
|                                              | nYFP- AtRAC1-F         | 5'-GAATTCAGGAAGAAGAAGAGAAATGAGCG-3'     |
|                                              | nYFP- AtRAC1-R         | 5'-GTCGACTCACAACGAACTCTGGAACAAT -3'     |
|                                              | RPS5A-F                | 5'- AGCAGCAGGAGATCTATCAGTGCA -3'        |
|                                              | RPS5A-R                | 5'- GGCTGTGGTGAGAGAAACAGAGC -3'         |
|                                              | In situ hybridization  | PLT1insitu-F                            |
| PLT1insitu-R                                 |                        | 5'-CCTAGACTGGCCTTCCCTTC -3'             |
| RT-PCR analysis of <i>RopGEF7</i> expression | GEF7-F                 | 5'-ATTCAACATTGTTGCACGCAT -3'            |
|                                              | GEF7-R                 | 5'-CGGCTCGATCTTTCTAAAGGA-3'             |
|                                              | ACTIN2-F               | 5'-ATGGCTGAGGCTGATGATATTCAAC-3'         |
|                                              | ACTIN2-R               | 5'-TACAAGGAGAGAACAGCTTGGATG-3'          |
| RT-qPCR analysis                             | GEF7qPCR-F             | 5'-CTGTACGGAGGATTCACGGC-3'              |
|                                              | GEF7qPCR-R             | 5'-CTTCTCCAAGCAGCAGTTTCGA-3'            |
|                                              | GEF1qPCR-F             | 5'- CGGCGGCAAAGATGTGGTC-3'              |
|                                              | GEF1qPCR-R             | 5'-GATTGGTGATGGCGTTGGAGAT-3'            |
|                                              | ACTIN7qPCR-F           | 5'-AGCGATGGCTGGAACAGAAC-3'              |
|                                              | ACTIN7qPCR-R           | 5'-CCTTCGTCTTGATCTTGCGG-3'              |

**Supplemental Table 2** Frequencies of embryo defects in RPS5A-RopGEF7RNAi plants

| Genotype             | Stage                     | Defects( def./t ot.) | Percentage(%)      |
|----------------------|---------------------------|----------------------|--------------------|
| WT(Col.)             | Before Heart <sup>1</sup> | 0/248                | 0                  |
|                      | Heart                     | 0/127                | 0                  |
| RPS5A-RopGEF7RNAi-L6 | Before Heart <sup>1</sup> | 16/332               | 4.8%               |
|                      | Heart                     | 30/156               | 19.2% <sup>2</sup> |

<sup>1</sup>Embryos were analyzed at proembryo, globular and triangular stages.

<sup>2</sup>Note that the frequency of RNAi heart embryos (in L6 line) with the basal defects is comparable to that of *plt1*<sup>-/-</sup>*plt2*<sup>+/-</sup>*plt3*<sup>-/-</sup>*bbm3*<sup>-/-</sup> mutants (Galinha et al., 2007).
